CORRECTION

# Correction: Driver Gaze Behavior Is Different in Normal Curve Driving and when Looking at the Tangent Point

The *PLOS ONE* Staff

There are errors in the Funding section. The publisher apologizes for the errors. The correct funding information is as follows: Mr. Jami Pekkanen received funding from a personal grant from Finnish Cultural Foundation (grant no. 00140724). Mr. Jami Pekkanen and Mr. Teemu Itkonen were employed in MULSIMCO project funded by the Finnish Academy ([www.aka.fi](http://www.aka.fi), project no. 1279905 PI prof. Heikki Summala). The funders had no role in study design, data collection and analysis, decision to publish, or preparation of the manuscript.

## Reference

1. Itkonen T, Pekkanen J, Lappi O (2015) Driver Gaze Behavior Is Different in Normal Curve Driving and when Looking at the Tangent Point. *PLoS ONE* 10(8): e0135505. doi: [10.1371/journal.pone.0135505](https://doi.org/10.1371/journal.pone.0135505) PMID: [26287914](https://pubmed.ncbi.nlm.nih.gov/26287914/)

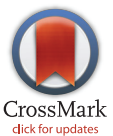

## OPEN ACCESS

**Citation:** The *PLOS ONE* Staff (2015) Correction: Driver Gaze Behavior Is Different in Normal Curve Driving and when Looking at the Tangent Point. *PLoS ONE* 10(9): e0139410. doi:10.1371/journal.pone.0139410

**Published:** September 24, 2015

**Copyright:** © 2015 The PLOS ONE Staff. This is an open access article distributed under the terms of the [Creative Commons Attribution License](https://creativecommons.org/licenses/by/4.0/), which permits unrestricted use, distribution, and reproduction in any medium, provided the original author and source are credited.
